# Supplementary material
Source: publisher figshare collection journal article supplement (https://sage.figshare.com/ndownloader/files/16450343)
Supplement: Supplementary file 1 [file 16450343]

## Appendix: Significance Tests

Explanation to the Bootstrap-tests for significance:

In the second and third column of the tables, the raw values are reported. Column four contains the differences between these values. In column five the reference bca- (bias corrected and accelerated) value is reported. If for positive (negative) values of the difference, the limit is also positive (negative), then this difference is significant at the given significance level ( $p=0.05$ ).

*Table 1: Comparison of the question “Have you ever been asked to participate in a competition manipulation or a match-fixing?” (RRT1) with independent variables gender, career status, sport (winter vs. summer), sport opponent (direct vs. indirect), sport participation (single vs. team) and finance status. Overall prevalence results for this question is a: 0.0842, b: 0.0200, c: 0.8957 (N = 357).*

| Gender                                  |                |                  |         |         |          |    |
|-----------------------------------------|----------------|------------------|---------|---------|----------|----|
|                                         | Male (n=182)   | Female (n=173)   | Diff    | low/bca | high/bca |    |
| Honest „yes“                            | 0.0544         | 0.1101           | 0.0557  | -0.1657 |          | ns |
| Cheater                                 | 0.0158         | 0.0223           | 0.0066  | -0.1172 |          | ns |
| Honest „no“                             | 0.9298         | 0.8676           | -0.0623 |         | 0.2566   | ns |
| Career status                           |                |                  |         |         |          |    |
|                                         | active (n=143) | finished(n=213)  | Diff    | low/bca | high/bca |    |
| Honest „yes“                            | 0.0808         | 0.0928           | 0.0120  | -0.1962 |          | ns |
| Cheater                                 | 0.0090         | 0.0306           | 0.0216  | -0.1163 |          | ns |
| Honest „no“                             | 0.9103         | 0.8766           | -0.0336 |         | 0.2963   | ns |
| Sport 1 (Winter/Summer)                 |                |                  |         |         |          |    |
|                                         | Summer (n=263) | Winter (n=72)    | Diff    | low/bca | high/bca |    |
| Honest „yes“                            | 0.1099         | 0.0041           | -0.1057 |         | 0.0522   | ns |
| Cheater                                 | 0.0542         | 0.0000           | -0.0542 |         | 0.0951   | ns |
| Honest „no“                             | 0.8359         | 0.9959           | 0.1599  | -0.0590 |          | ns |
| Sport 2 (direct vs. indirect opponent)  |                |                  |         |         |          |    |
|                                         | direct (n=114) | indirect (n=198) | Diff    | low/bca | high/bca |    |
| Honest „yes“                            | 0.2349         | 0.0000           | -0.2349 |         | 0.0000   | ns |
| Cheater                                 | 0.2386         | 0.0000           | -0.2386 |         | 0.0000   | ns |
| Honest „no“                             | 0.5265         | 1.0000           | 0.4735  | 0.0499  |          | *  |
| Sport 3 (single participation vs. team) |                |                  |         |         |          |    |
|                                         | Single (n=138) | Team (n=165)     | Diff    | low/bca | high/bca |    |
| Honest „yes“                            | 0.0000         | 0.0729           | 0.0729  | -0.0681 |          | ns |
| Cheater                                 | 0.0000         | 0.0434           | 0.0434  | -0.0991 |          | ns |



|              | Independent<br>(N=216) | Dependent<br>(n=117) | Diff    | low/bc $\alpha$ | high/bc $\alpha$ |    |
|--------------|------------------------|----------------------|---------|-----------------|------------------|----|
| Honest „yes“ | 0.0093                 | 0.1991               | 0.1898  | -0.0155         |                  | ns |
| Cheater      | 0.0648                 | 0.1710               | 0.1062  | -0.1194         |                  | ns |
| Honest „no“  | 0.9259                 | 0.6299               | -0.2961 |                 | 0.1106           | ns |

\* significant with significance level 5%, n.s – not significant.

*Table 3: Comparison of the question “Have you ever mentioned that anyone tries to influence a referee with the aim of competition manipulation or match-fixing?” (RRT 3) with independent variables gender, career status, sport (winter vs. summer), sport opponent (direct vs. indirect), sport participation (single vs. team) and finance status. Overall prevalence results for this question is a: 0.3299, b: 0.0544, c: 0.6156 (N = 355).*

| Gender                                  |                        |                      |         |                 |                  |    |
|-----------------------------------------|------------------------|----------------------|---------|-----------------|------------------|----|
|                                         | Male (n=180)           | Female (n=173)       | Diff    | low/bc $\alpha$ | high/bc $\alpha$ |    |
| Honest „yes“                            | 0.2567                 | 0.4179               | 0.1612  | -0.0895         |                  | ns |
| Cheater                                 | 0.0000                 | 0.1232               | 0.1232  | -0.0369         |                  | ns |
| Honest „no“                             | 0.7433                 | 0.4589               | -0.2844 |                 | 0.0806           | ns |
| Career status                           |                        |                      |         |                 |                  |    |
|                                         | Active<br>(n=142)      | Finished<br>(n=212)  | Diff    | low/bc $\alpha$ | high/bc $\alpha$ |    |
| Honest „yes“                            | 0.3676                 | 0.2989               | -0.0687 |                 | 0.2129           | ns |
| Cheater                                 | 0.0629                 | 0.0467               | -0.0163 |                 | 0.1467           | ns |
| Honest „no“                             | 0.5694                 | 0.6544               | 0.0850  | -0.3214         |                  | ns |
| Sport 1 (Winter/Summer)                 |                        |                      |         |                 |                  |    |
|                                         | Summer<br>(n=263)      | Winter (n=71)        | Diff    | low/bc $\alpha$ | high/bc $\alpha$ |    |
| Honest „yes“                            | 0.3800                 | 0.2053               | -0.1748 |                 | 0.1133           | ns |
| Cheater                                 | 0.0710                 | 0.0376               | -0.0335 |                 | 0.1990           | ns |
| Honest „no“                             | 0.5489                 | 0.7572               | 0.2082  | -0.2799         |                  | ns |
| Sport 2 (direct vs. indirect opponent)  |                        |                      |         |                 |                  |    |
|                                         | Direct<br>(n=113)      | Indirect<br>(n=198)  | Diff    | low/bc $\alpha$ | high/bc $\alpha$ |    |
| Honest „yes“                            | 0.3625                 | 0.3056               | -0.0569 |                 | 0.1910           | ns |
| Cheater                                 | 0.0329                 | 0.0463               | 0.0134  | -0.1645         |                  | ns |
| Honest „no“                             | 0.6046                 | 0.6481               | 0.0435  | -0.3414         |                  | ns |
| Sport 3 (single participation vs. team) |                        |                      |         |                 |                  |    |
|                                         | Single<br>(n=138)      | Team (n=164)         | Diff    | low/bc $\alpha$ | high/bc $\alpha$ |    |
| Honest „yes“                            | 0.2339                 | 0.4219               | 0.1880  | -0.0517         |                  | ns |
| Cheater                                 | 0.0180                 | 0.0594               | 0.0415  | -0.1119         |                  | ns |
| Honest „no“                             | 0.7481                 | 0.5187               | -0.2294 |                 | 0.1473           | ns |
| Finance status                          |                        |                      |         |                 |                  |    |
|                                         | Independent<br>(n=218) | Dependent<br>(n=120) | Diff    | low/bc $\alpha$ | high/bc $\alpha$ |    |
| Honest „yes“                            | 0.2884                 | 0.4951               | 0.2067  | -0.0484         |                  | ns |

|             |        |        |         |        |         |   |
|-------------|--------|--------|---------|--------|---------|---|
| Cheater     | 0.0000 | 0.2598 | 0.2598  | 0.0439 |         | * |
| Honest „no“ | 0.7116 | 0.2451 | -0.4665 |        | -0.0587 | * |

\* significant with significance level 5%, n.s – not significant.

*Table 4: Comparison of the question “Have you ever mentioned that anyone tries to influence a referee with the aim of competition manipulation or match-fixing?” (RRT 4) with independent variables gender, career status, sport (winter vs. summer), sport opponent (direct vs. indirect), sport participation (single vs. team) and finance status. Overall prevalence results for this question is a: 0.0490, b: 0.0462, c: 0.9047 (N = 351).*

| Gender                                  |                     |                   |         |                 |                  |    |
|-----------------------------------------|---------------------|-------------------|---------|-----------------|------------------|----|
|                                         | Male (n=178)        | Female (n=171)    | Diff    | low/bc $\alpha$ | high/bc $\alpha$ |    |
| Honest „yes“                            | 0.0000              | 0.1324            | 0.1324  | -0.0255         |                  | ns |
| Cheater                                 | 0.0394              | 0.0867            | 0.0473  | -0.1325         |                  | ns |
| Honest „no“                             | 0.9606              | 0.7809            | -0.1797 |                 | 0.1103           | ns |
| Career status                           |                     |                   |         |                 |                  |    |
|                                         | Active (n=139)      | Finished (n=211)  | Diff    | low/bc $\alpha$ | high/bc $\alpha$ |    |
| Honest „yes“                            | 0.0329              | 0.0820            | 0.0491  | -0.1210         |                  | ns |
| Cheater                                 | 0.0000              | 0.1011            | 0.1011  | -0.0303         |                  | ns |
| Honest „no“                             | 0.9671              | 0.8169            | -0.1502 |                 | 0.0887           | ns |
| Sport 1 (Winter/Summer)                 |                     |                   |         |                 |                  |    |
|                                         | Summer (n=262)      | Winter (n=67)     | Diff    | low/bc $\alpha$ | high/bc $\alpha$ |    |
| Honest „yes“                            | 0.0803              | 0.0000            | -0.0803 |                 | 0.1330           | ns |
| Cheater                                 | 0.0124              | 0.1121            | 0.0998  | -0.0973         |                  | ns |
| Honest „no“                             | 0.9073              | 0.8879            | -0.0195 |                 | 0.2744           | ns |
| Sport 2 (direct vs. indirect opponent)  |                     |                   |         |                 |                  |    |
|                                         | Direct (n=111)      | Indirect (n=195)  | Diff    | low/bc $\alpha$ | high/bc $\alpha$ |    |
| Honest „yes“                            | 0.1806              | 0.0143            | -0.1663 |                 | 0.0728           | ns |
| Cheater                                 | 0.1250              | 0.0270            | -0.0980 |                 | 0.1173           | ns |
| Honest „no“                             | 0.6944              | 0.9588            | 0.2643  | -0.1186         |                  | ns |
| Sport 3 (single participation vs. team) |                     |                   |         |                 |                  |    |
|                                         | Single (N=135)      | Team (N=162)      |         |                 |                  |    |
| Honest „yes“                            | 0.0653              | 0.0864            | 0.0211  | -0.2397         |                  | ns |
| Cheater                                 | 0.1628              | 0.0000            | -0.1628 |                 | 0.0219           | ns |
| Honest „no“                             | 0.7719              | 0.9136            | 0.1417  | -0.1720         |                  | ns |
| Finance status                          |                     |                   |         |                 |                  |    |
|                                         | Independent (N=216) | Dependent (N=118) |         |                 |                  |    |
| Honest „yes“                            | 0.0003              | 0.2265            | 0.2262  | 0.0209          |                  | *  |
| Cheater                                 | 0.0000              | 0.2848            | 0.2848  | 0.0542          |                  | *  |
| Honest „no“                             | 0.9997              | 0.4887            | -0.5110 |                 | -0.1354          | *  |

\* significant with significance level 5%, n.s – not significant.
